# Supplementary material
Source: ML conference proceedings conference paper supplement (https://openreview.net/forum?id=-3G6_D66Aua)
Supplement: supplementary_material [file attachment]

## 349 A Learning Details

| Hyperparameter      | CCN, real | CCN, sim | DiffSim, real | DiffSim, sim |
|---------------------|-----------|----------|---------------|--------------|
| $w_{\text{comp}}$   | 0.001     | 0.001    | N/A           | N/A          |
| $w_{\text{diss}}$   | 0.1       | 0.1      | N/A           | N/A          |
| $w_{\text{pen}}$    | 100       | 100      | N/A           | N/A          |
| $w_{\text{res}}$    | 1         | 0.001    | 1000          | 1            |
| $w_{\text{res}, w}$ | 0.1       | 0        | 1             | 0            |

Table 2: Tuned hyperparameters. Rows for residual norm ( $w_{\text{res}}$ ) and weight ( $w_{\text{res}, w}$ ) regularization only apply for -R variations. Real versus simulated experiments performed best with different residual regularization weights since the simulations featured larger model-to-actual dynamics gaps.

### 350 A.1 Model-Based Parameter Learning

351 For our CCN and CCN-R method, we performed a hyperparameter search to determine the most  
 352 effective set of weights for balancing the loss terms in (5). See Table 2 for these sets of weights.

### 353 A.2 Residual Network Architecture and Regularization

354 The residual network featured in both CCN-R and DiffSim-R has the same architecture. The first  
 355 layer takes in the full state of the system and converts the quaternion orientation representation into  
 356 a 9-vector of the elements of the corresponding rotation matrix, letting the remaining state positions  
 357 and velocities pass through to layer 2. Beyond the first layer, the network is a fully-connected multi-  
 358 layer perceptron (MLP) with two hidden layers of size 128. The last layer outputs values in the  
 359 acceleration space of the system. All activations are ReLU.

360 We regularized the residual via both output norm regularization and weight regularization, with as-  
 361 sociated weight hyperparameters  $w_{\text{res}}$  and  $w_{\text{res}, w}$ , respectively. See Table 2 for the optimal values.  
 362 Since the simulation examples were specifically designed to test the capabilities of the residual net-  
 363 work, we found the optimal weights for the residual terms were much lower for simulated examples  
 364 than for the real data. We also note that the optimal residual weights were much higher for DiffSim  
 365 than for CCN. This is a direct result from the DiffSim residual’s attempts to explain some of the  
 366 contact dynamics, whose accelerations are orders of magnitude larger than the continuous accelera-  
 367 tions. Our CCN method avoids this by better containing its residual in the continuous domain, and  
 368 thus could use lower residual regularization weights.

### 369 A.3 End-to-End Network Architecture

370 The best performing network for the End-to-end baseline is an MLP with 4 hidden layers each of  
 371 size 256 with Tanh activation. Its input is the full state of the system, and its output is the next  
 372 velocity. The next configuration is obtained from predicted next velocity with an Euler step (6b).

## 373 B Inertia Evaluation Metric Details

374 A body’s set of inertial parameters is  $\mathcal{I} = [m, p_x, p_y, p_z, I_{xx}, I_{yy}, I_{zz}, I_{xy}, I_{xz}, I_{yz}]$ . Since true in-  
 375ertia parameter vectors feature values at wildly different scales, the vector  $s$  is selected to normalize  
 376  $\mathcal{I}$  to more equally evaluate all inertial parameter errors. For example, the true inertial parameters for  
 377 the simulated asymmetric object used in the vortex example are

$$\mathcal{I}_{\text{asym}} = [0.25, 0, 0, 0, 0.00081, 0.00081, 0.00081, 0, 0, 0]. \quad (14)$$

378 Choosing 3.5cm as a reasonable center of mass location distance, the associated  $s_{\text{asym}}$  normalizer is

$$s_{\text{asym}} = \left[ \frac{1}{0.25}, \frac{1}{0.035}, \frac{1}{0.035}, \frac{1}{0.035}, \frac{1}{0.00081}, \frac{1}{0.00081}, \frac{1}{0.00081}, \frac{1}{0.00081}, \frac{1}{0.00081}, \frac{1}{0.00081} \right]. \quad (15)$$
